# Supplementary material for: A convenient and highly tunable way to n-type carbon nanotube thermoelectric composite film using common alkylammonium cationic surfactant
Source: Royal Society of Chemistry journal article supplement (doi:10.1039/c8ta07746k), 2018-01-01
Supplement: c8ta07746k1.pdf [file c8ta07746k1.pdf]

## Supporting Information

Electronic Supplementary Information (ESI) Materials for Journal of Materials Chemistry A  
This journal is © The Royal Society of Chemistry 2018

# A Convenient and Highly-Tunable Way to N-Type Carbon Nanotube Thermoelectric Composite Film Using Common Alkylammonium Cationic Surfactant

Xuejiang Cheng,<sup>a,b</sup> Xin Wang<sup>\*,b</sup> and Guangming Chen<sup>\*,a,c</sup>

<sup>a</sup> *College of Materials Science and Engineering, Shenzhen University, Shenzhen 518071, P. R. China*

<sup>b</sup> *Key Laboratory of Rubber-Plastics, Ministry of Education, Qingdao University of Science and Technology, Qingdao 266042 P. R. China*

<sup>c</sup> *Institute of Chemistry, Chinese Academy of Sciences, Beijing 100190, P. R. China.*

*\*Corresponding author - E-mail: chengm@szu.edu.cn (G. Chen).*

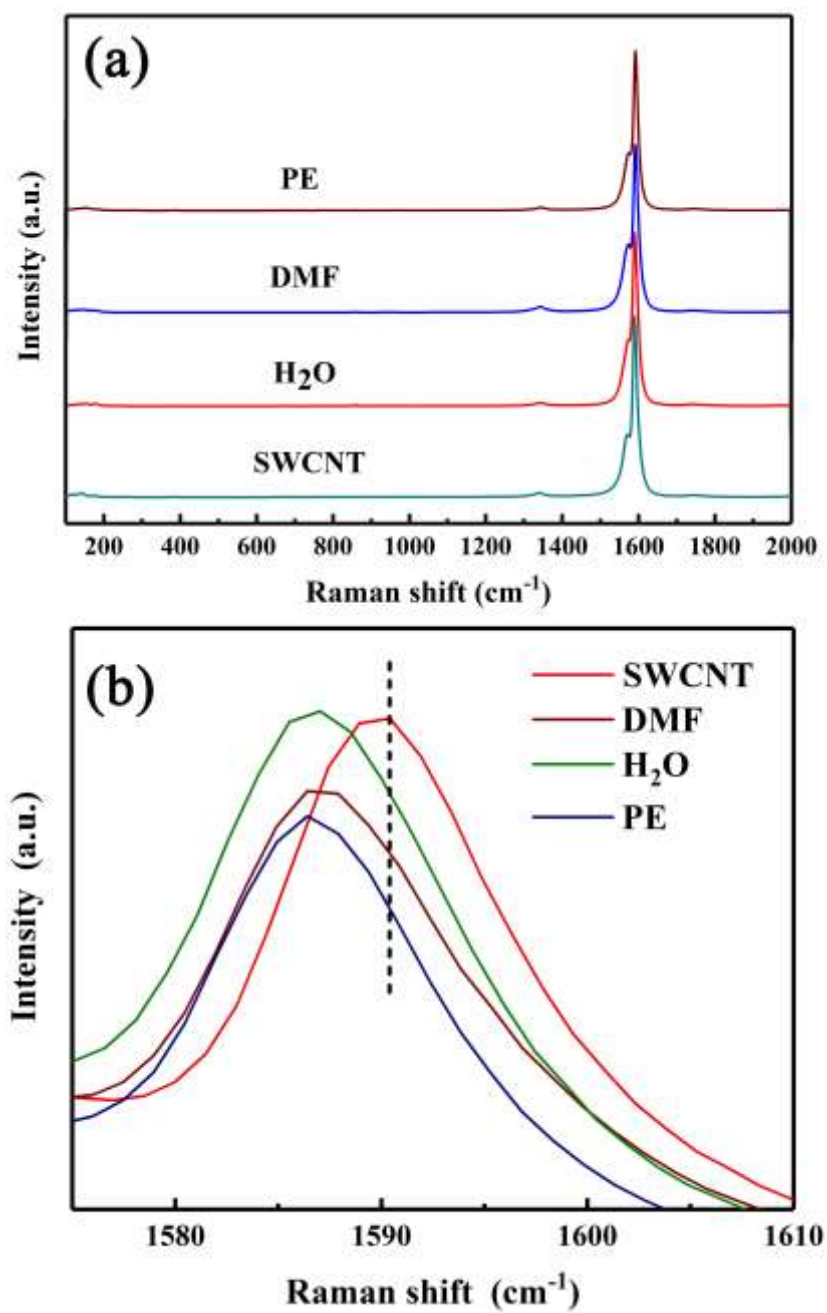

**Figure S1.** Raman spectra of the undoped SWCNT and the CTAB-doped SWCNTs prepared in H<sub>2</sub>O, DMF and PE, respectively.

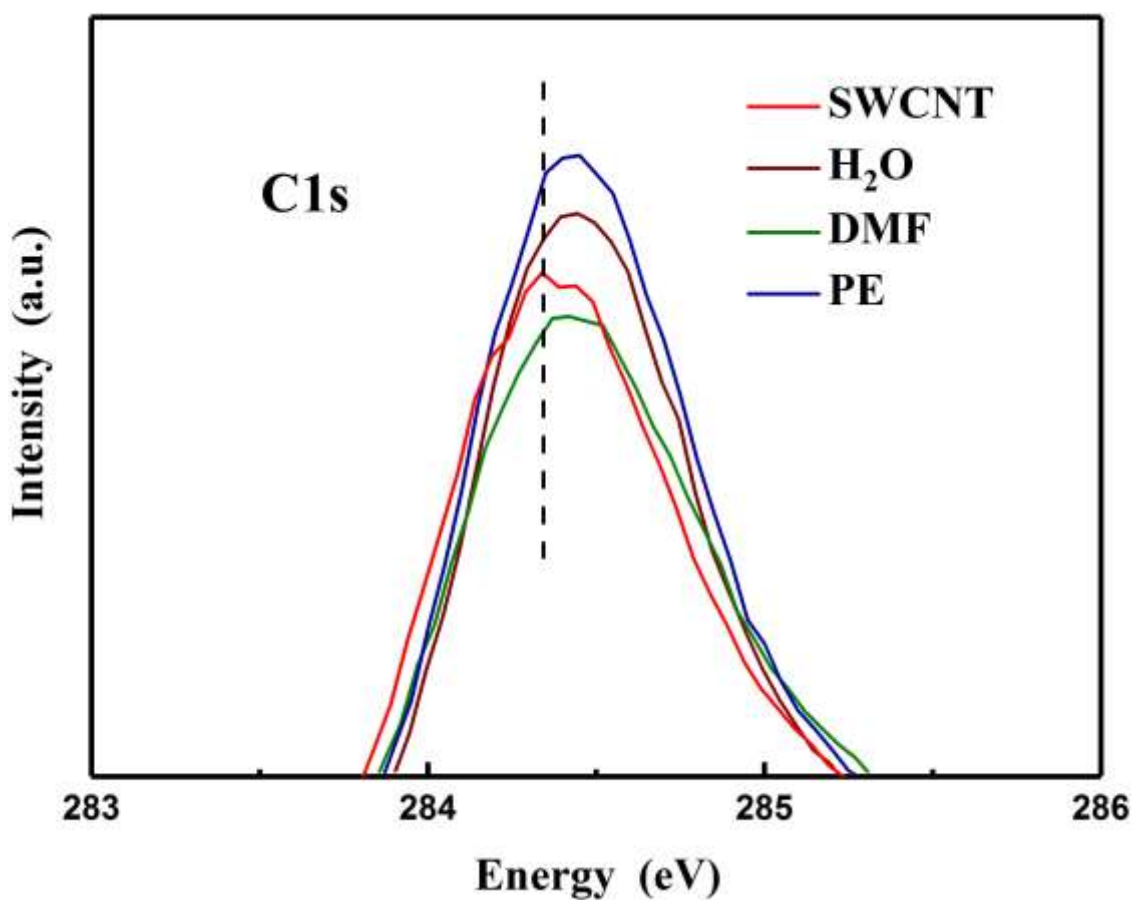

**Figure S2.** XPS spectra of the undoped SWCNT and the CTAB-doped SWCNTs prepared in H<sub>2</sub>O, DMF and PE, respectively.

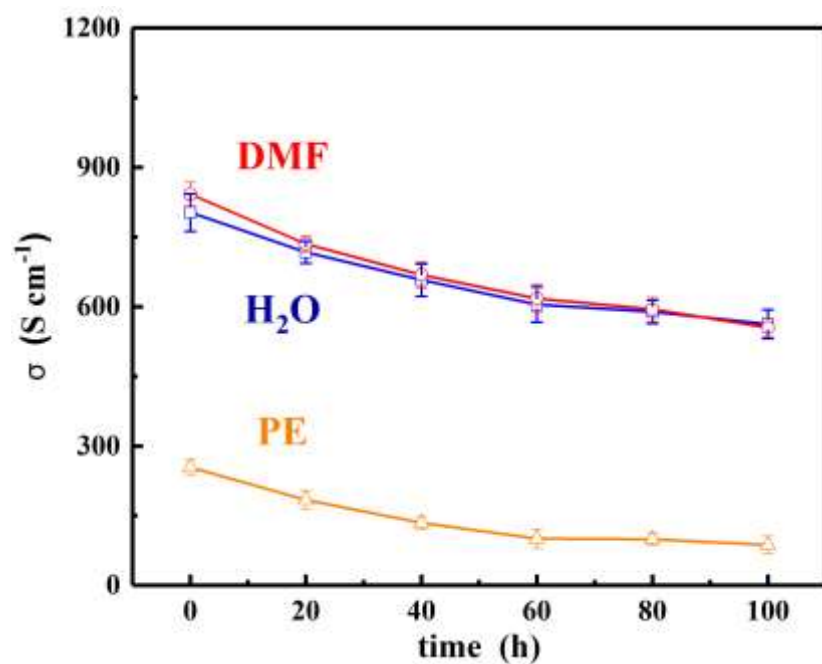

**Figure S3.** Air stability of the electrical conductivity for the CTAB-doped SWCNTs prepared in H<sub>2</sub>O, DMF and PE, respectively.
